# Supplementary material for: Synthesis, in vitro antitumour activity, and molecular docking study of novel 2-substituted mercapto-3-(3,4,5-trimethoxybenzyl)-4(3H)-quinazolinone analogues
Source: PubMed Central journal article supplement (PMC6010141; doi:10.1080/14756366.2017.1368504), 2017-09-26
Supplement: IENZ_A_1368504_SM9929.pdf [file IENZ_A_1368504_SM9929.pdf]

## **Supporting Information**

### ***Synthesis, in vitro antitumor activity, and molecular docking study of novel 2-substituted mercapto-3-(3,4,5-trimethoxybenzyl)-4(3H)-quinazolinone analogs***

***Adel S. El-Azab*** <sup>a,b \*</sup>, ***Alaa A.-M. Abdel-Aziz*** <sup>a,c\*</sup>, ***Hazem A. Ghabbour*** <sup>a,c</sup>, ***Manal A. Al-Gendy*** <sup>a</sup>

<sup>a</sup>*Department of Pharmaceutical Chemistry, College of Pharmacy, King Saud University, Riyadh 11451, Saudi Arabia*

<sup>b</sup>*Department of Organic Chemistry, Faculty of Pharmacy, Al-Azhar University, Cairo 11884, Egypt*

<sup>c</sup>*Department of Medicinal Chemistry, Faculty of Pharmacy, University of Mansoura, Mansoura 35516, Egypt*

<sup>e</sup>*Department of Pharmaceutical Chemistry, College of Pharmacy, Sattam bin Abdulaziz University, AlKharj, Saudi Arabia*

Correspondence: College of Pharmacy, P.O. Box 2457, King Saud University, Riyadh-11451, Saudi Arabia (A. S.

El-Azab, E-mail: [adelazab@ksu.edu.sa](mailto:adelazab@ksu.edu.sa), [adelazaba@yahoo.com](mailto:adelazaba@yahoo.com)) and (A. A.-M. Abdel-Aziz, E-mail:

[almoenes@ksu.edu.sa](mailto:almoenes@ksu.edu.sa), [alaa\\_moenes@yahoo.com](mailto:alaa_moenes@yahoo.com))

***Figure Captions***

**Figure S1:** ORTEP diagram of compound **8**. Displacement ellipsoids are plotted at the 40% probability level for non-H atoms

**Figure S2:** Molecular packing of titled compound viewed hydrogen bonds which are drawn as dashed lines along b axis.

**Table S1:** X-ray crystallographic data for compound **8**.

**Table S2:** Geometric parameters (Å, °) of compound **8**

**Table S3:** Hydrogen-bond geometry (Å, °)

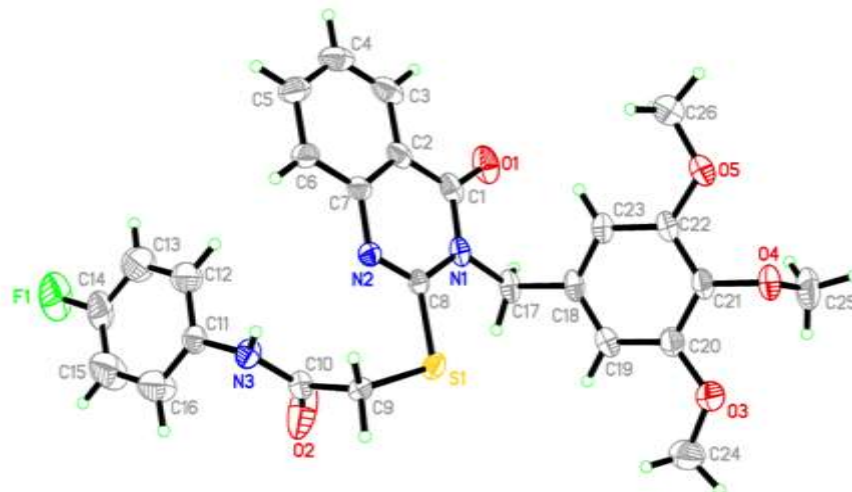

**Figure S1:** ORTEP diagram of compound **8**. Displacement ellipsoids are plotted at the 40% probability level for non-H atoms.

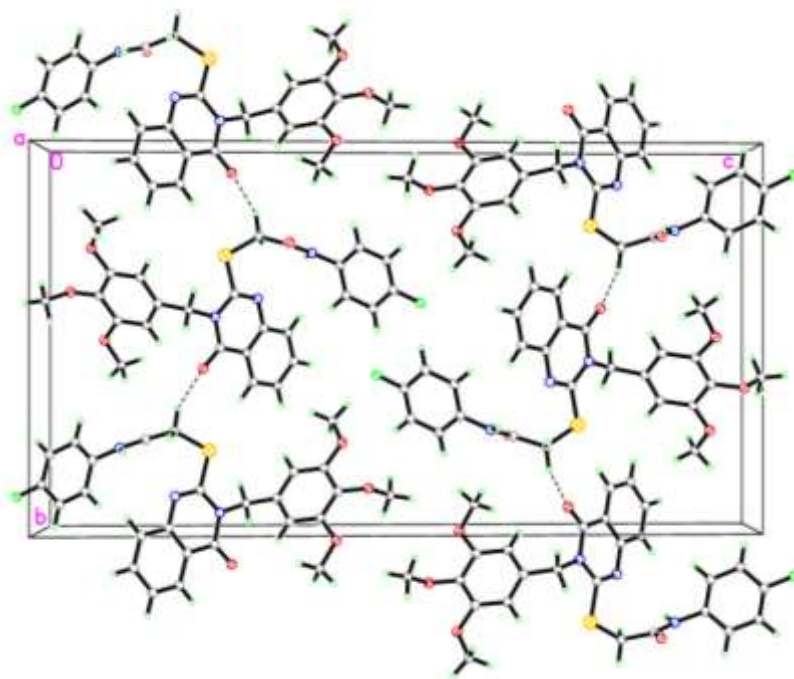

**Figure S2:** Molecular packing of titled compound viewed hydrogen bonds which are drawn as dashed lines along *b* axis.

| <b>Crystal data</b>                                                                                                     |                                                                        |
|-------------------------------------------------------------------------------------------------------------------------|------------------------------------------------------------------------|
| Chemical formula                                                                                                        | C <sub>26</sub> H <sub>24</sub> FN <sub>3</sub> O <sub>5</sub> S       |
| Mr                                                                                                                      | 509.54                                                                 |
| Crystal system, space group                                                                                             | Monoclinic, <i>P</i> 2 <sub>1</sub> / <i>n</i>                         |
| Temperature (K)                                                                                                         | 293                                                                    |
| <i>a</i> , <i>b</i> , <i>c</i> (Å)                                                                                      | 4.6461 (2), 16.7264 (6), 31.2525 (10)                                  |
| $\beta$ (°)                                                                                                             | 92.301 (1)                                                             |
| <i>V</i> (Å <sup>3</sup> )                                                                                              | 2426.75 (16)                                                           |
| <i>Z</i>                                                                                                                | 4                                                                      |
| Radiation type                                                                                                          | Mo <i>K</i> $\alpha$                                                   |
| $\mu$ (mm <sup>-1</sup> )                                                                                               | 0.18                                                                   |
| Crystal size (mm)                                                                                                       | 0.42 × 0.17 × 0.05                                                     |
| <b>Data collection</b>                                                                                                  |                                                                        |
| Diffractometer                                                                                                          | Bruker APEX-II D8 venture diffractometer                               |
| Absorption correction                                                                                                   | Multi-scan<br>SADABS Bruker 2014                                       |
| Tmin, Tmax                                                                                                              | 0.927, 0.991                                                           |
| No. of measured, independent and observed [ <i>I</i> > 2 $\sigma$ ( <i>I</i> )] reflections                             | 60929, 9710, 5125                                                      |
| <i>R</i> <sub>int</sub>                                                                                                 | 0.058                                                                  |
| <b>Refinement</b>                                                                                                       |                                                                        |
| <i>R</i> [ <i>F</i> <sup>2</sup> > 2 $\sigma$ ( <i>F</i> <sup>2</sup> )], <i>wR</i> ( <i>F</i> <sup>2</sup> ), <i>S</i> | 0.074, 0.221, 1.02                                                     |
| No. of reflections                                                                                                      | 9710                                                                   |
| No. of parameters                                                                                                       | 332                                                                    |
| No. of restraints                                                                                                       | 0                                                                      |
| H-atom treatment                                                                                                        | H atoms treated by a mixture of independent and constrained refinement |
| $\Delta\rho_{\max}$ , $\Delta\rho_{\min}$ (e Å <sup>-3</sup> )                                                          | 0.58, -0.36                                                            |

**Table S1:** X-ray crystallographic data for compound **8**.

**Table S2** Geometric parameters (Å, °)

|         |           |          |           |
|---------|-----------|----------|-----------|
| S1—C8   | 1.768 (2) | C9—H9B   | 0.9900    |
| S1—C9   | 1.800 (2) | C11—C16  | 1.348 (4) |
| F1—C14  | 1.363 (3) | C11—C12  | 1.361 (4) |
| O1—C1   | 1.225 (3) | C12—C13  | 1.397 (4) |
| O2—C10  | 1.195 (3) | C12—H12A | 0.9500    |
| O3—C20  | 1.363 (3) | C13—C14  | 1.337 (5) |
| O3—C24  | 1.401 (4) | C13—H13A | 0.9500    |
| O4—C21  | 1.376 (3) | C14—C15  | 1.334 (5) |
| O4—C25  | 1.423 (5) | C15—C16  | 1.385 (4) |
| O5—C22  | 1.365 (3) | C15—H15A | 0.9500    |
| O5—C26  | 1.416 (4) | C16—H16A | 0.9500    |
| N1—C8   | 1.386 (2) | C17—C18  | 1.514 (3) |
| N1—C1   | 1.401 (3) | C17—H17A | 0.9900    |
| N1—C17  | 1.476 (3) | C17—H17B | 0.9900    |
| N2—C8   | 1.286 (2) | C18—C19  | 1.379 (3) |
| N2—C7   | 1.385 (3) | C18—C23  | 1.383 (3) |
| N3—C10  | 1.315 (3) | C19—C20  | 1.397 (3) |
| N3—C11  | 1.428 (3) | C19—H19A | 0.9500    |
| N3—H1N3 | 0.79 (3)  | C20—C21  | 1.380 (3) |
| C1—C2   | 1.449 (4) | C21—C22  | 1.385 (4) |
| C2—C7   | 1.397 (3) | C22—C23  | 1.396 (3) |
| C2—C3   | 1.407 (3) | C23—H23A | 0.9500    |

|             |             |               |             |
|-------------|-------------|---------------|-------------|
| C3—C4       | 1.368 (4)   | C24—H24A      | 0.9800      |
| C3—H3A      | 0.9500      | C24—H24B      | 0.9800      |
| C4—C5       | 1.381 (4)   | C24—H24C      | 0.9800      |
| C4—H4A      | 0.9500      | C25—H25A      | 0.9800      |
| C5—C6       | 1.378 (3)   | C25—H25B      | 0.9800      |
| C5—H5A      | 0.9500      | C25—H25C      | 0.9800      |
| C6—C7       | 1.403 (3)   | C26—H26A      | 0.9800      |
| C6—H6A      | 0.9500      | C26—H26B      | 0.9800      |
| C9—C10      | 1.515 (3)   | C26—H26C      | 0.9800      |
| C9—H9A      | 0.9900      |               |             |
| C8—S1—C9    | 99.70 (9)   | C12—C13—H13A  | 120.9       |
| C20—O3—C24  | 119.3 (2)   | C15—C14—C13   | 122.3 (3)   |
| C21—O4—C25  | 113.2 (3)   | C15—C14—F1    | 119.8 (3)   |
| C22—O5—C26  | 118.1 (2)   | C13—C14—F1    | 117.7 (3)   |
| C8—N1—C1    | 120.50 (18) | C14—C15—C16   | 119.1 (3)   |
| C8—N1—C17   | 121.65 (19) | C14—C15—H15A  | 120.5       |
| C1—N1—C17   | 117.73 (18) | C16—C15—H15A  | 120.5       |
| C8—N2—C7    | 118.18 (17) | C11—C16—C15   | 120.6 (3)   |
| C10—N3—C11  | 123.51 (19) | C11—C16—H16A  | 119.7       |
| C10—N3—H1N3 | 111 (2)     | C15—C16—H16A  | 119.7       |
| C11—N3—H1N3 | 122 (2)     | N1—C17—C18    | 114.64 (17) |
| O1—C1—N1    | 120.2 (2)   | N1—C17—H17A   | 108.6       |
| O1—C1—C2    | 124.3 (2)   | C18—C17—H17A  | 108.6       |
| N1—C1—C2    | 115.48 (18) | N1—C17—H17B   | 108.6       |
| C7—C2—C3    | 119.8 (2)   | C18—C17—H17B  | 108.6       |
| C7—C2—C1    | 119.1 (2)   | H17A—C17—H17B | 107.6       |
| C3—C2—C1    | 121.1 (2)   | C19—C18—C23   | 120.20 (19) |
| C4—C3—C2    | 119.7 (3)   | C19—C18—C17   | 119.6 (2)   |
| C4—C3—H3A   | 120.2       | C23—C18—C17   | 120.0 (2)   |
| C2—C3—H3A   | 120.2       | C18—C19—C20   | 119.9 (2)   |
| C3—C4—C5    | 120.6 (2)   | C18—C19—H19A  | 120.1       |
| C3—C4—H4A   | 119.7       | C20—C19—H19A  | 120.1       |
| C5—C4—H4A   | 119.7       | O3—C20—C21    | 114.8 (2)   |
| C6—C5—C4    | 121.2 (3)   | O3—C20—C19    | 124.9 (2)   |
| C6—C5—H5A   | 119.4       | C21—C20—C19   | 120.3 (2)   |
| C4—C5—H5A   | 119.4       | O4—C21—C20    | 120.3 (2)   |
| C5—C6—C7    | 119.2 (2)   | O4—C21—C22    | 120.0 (2)   |
| C5—C6—H6A   | 120.4       | C20—C21—C22   | 119.7 (2)   |
| C7—C6—H6A   | 120.4       | O5—C22—C21    | 115.33 (19) |
| N2—C7—C2    | 121.9 (2)   | O5—C22—C23    | 124.4 (2)   |
| N2—C7—C6    | 118.49 (19) | C21—C22—C23   | 120.2 (2)   |
| C2—C7—C6    | 119.6 (2)   | C18—C23—C22   | 119.7 (2)   |
| N2—C8—N1    | 124.81 (19) | C18—C23—H23A  | 120.1       |
| N2—C8—S1    | 118.92 (14) | C22—C23—H23A  | 120.1       |
| N1—C8—S1    | 116.27 (14) | O3—C24—H24A   | 109.5       |
| C10—C9—S1   | 111.56 (13) | O3—C24—H24B   | 109.5       |
| C10—C9—H9A  | 109.3       | H24A—C24—H24B | 109.5       |
| S1—C9—H9A   | 109.3       | O3—C24—H24C   | 109.5       |
| C10—C9—H9B  | 109.3       | H24A—C24—H24C | 109.5       |

|                |              |                 |              |
|----------------|--------------|-----------------|--------------|
| S1—C9—H9B      | 109.3        | H24B—C24—H24C   | 109.5        |
| H9A—C9—H9B     | 108.0        | O4—C25—H25A     | 109.5        |
| O2—C10—N3      | 121.9 (2)    | O4—C25—H25B     | 109.5        |
| O2—C10—C9      | 121.2 (2)    | H25A—C25—H25B   | 109.5        |
| N3—C10—C9      | 116.88 (17)  | O4—C25—H25C     | 109.5        |
| C16—C11—C12    | 118.9 (2)    | H25A—C25—H25C   | 109.5        |
| C16—C11—N3     | 121.9 (2)    | H25B—C25—H25C   | 109.5        |
| C12—C11—N3     | 119.0 (2)    | O5—C26—H26A     | 109.5        |
| C11—C12—C13    | 120.6 (3)    | O5—C26—H26B     | 109.5        |
| C11—C12—H12A   | 119.7        | H26A—C26—H26B   | 109.5        |
| C13—C12—H12A   | 119.7        | O5—C26—H26C     | 109.5        |
| C14—C13—C12    | 118.1 (3)    | H26A—C26—H26C   | 109.5        |
| C14—C13—H13A   | 120.9        | H26B—C26—H26C   | 109.5        |
| C8—N1—C1—O1    | -178.69 (19) | C16—C11—C12—C13 | 3.4 (6)      |
| C17—N1—C1—O1   | -2.6 (3)     | N3—C11—C12—C13  | 178.4 (3)    |
| C8—N1—C1—C2    | 2.5 (3)      | C11—C12—C13—C14 | 1.9 (7)      |
| C17—N1—C1—C2   | 178.61 (16)  | C12—C13—C14—C15 | -6.5 (7)     |
| O1—C1—C2—C7    | 179.4 (2)    | C12—C13—C14—F1  | 178.9 (4)    |
| N1—C1—C2—C7    | -1.8 (3)     | C13—C14—C15—C16 | 5.5 (7)      |
| O1—C1—C2—C3    | -1.0 (3)     | F1—C14—C15—C16  | -180.0 (4)   |
| N1—C1—C2—C3    | 177.80 (19)  | C12—C11—C16—C15 | -4.5 (6)     |
| C7—C2—C3—C4    | -0.6 (3)     | N3—C11—C16—C15  | -179.3 (4)   |
| C1—C2—C3—C4    | 179.8 (2)    | C14—C15—C16—C11 | 0.2 (8)      |
| C2—C3—C4—C5    | 0.1 (4)      | C8—N1—C17—C18   | -92.6 (2)    |
| C3—C4—C5—C6    | 0.7 (4)      | C1—N1—C17—C18   | 91.3 (2)     |
| C4—C5—C6—C7    | -1.0 (4)     | N1—C17—C18—C19  | 131.2 (2)    |
| C8—N2—C7—C2    | 1.0 (3)      | N1—C17—C18—C23  | -54.3 (3)    |
| C8—N2—C7—C6    | -178.83 (17) | C23—C18—C19—C20 | -1.6 (3)     |
| C3—C2—C7—N2    | -179.52 (19) | C17—C18—C19—C20 | 172.9 (2)    |
| C1—C2—C7—N2    | 0.1 (3)      | C24—O3—C20—C21  | -170.5 (3)   |
| C3—C2—C7—C6    | 0.3 (3)      | C24—O3—C20—C19  | 10.6 (4)     |
| C1—C2—C7—C6    | 179.95 (18)  | C18—C19—C20—O3  | 178.2 (2)    |
| C5—C6—C7—N2    | -179.7 (2)   | C18—C19—C20—C21 | -0.7 (4)     |
| C5—C6—C7—C2    | 0.4 (3)      | C25—O4—C21—C20  | 78.8 (3)     |
| C7—N2—C8—N1    | -0.3 (3)     | C25—O4—C21—C22  | -101.8 (3)   |
| C7—N2—C8—S1    | 179.13 (13)  | O3—C20—C21—O4   | 3.0 (4)      |
| C1—N1—C8—N2    | -1.5 (3)     | C19—C20—C21—O4  | -178.0 (2)   |
| C17—N1—C8—N2   | -177.49 (17) | O3—C20—C21—C22  | -176.3 (2)   |
| C1—N1—C8—S1    | 179.00 (14)  | C19—C20—C21—C22 | 2.7 (4)      |
| C17—N1—C8—S1   | 3.0 (2)      | C26—O5—C22—C21  | 179.9 (2)    |
| C9—S1—C8—N2    | 8.14 (17)    | C26—O5—C22—C23  | 1.7 (4)      |
| C9—S1—C8—N1    | -172.35 (14) | O4—C21—C22—O5   | 0.0 (4)      |
| C8—S1—C9—C10   | 69.34 (15)   | C20—C21—C22—O5  | 179.3 (2)    |
| C11—N3—C10—O2  | -10.0 (4)    | O4—C21—C22—C23  | 178.2 (2)    |
| C11—N3—C10—C9  | 171.7 (2)    | C20—C21—C22—C23 | -2.4 (4)     |
| S1—C9—C10—O2   | 50.1 (3)     | C19—C18—C23—C22 | 1.8 (3)      |
| S1—C9—C10—N3   | -131.64 (18) | C17—C18—C23—C22 | -172.64 (19) |
| C10—N3—C11—C16 | 67.7 (4)     | O5—C22—C23—C18  | 178.3 (2)    |
| C10—N3—C11—C12 | -107.2 (3)   | C21—C22—C23—C18 | 0.2 (3)      |

**Table S3:** Hydrogen-bond geometry (Å, °)

| <b>D—H···A</b>            | <b>D—H</b> | <b>H···A</b> | <b>D···A</b> | <b>D—H···A</b> |
|---------------------------|------------|--------------|--------------|----------------|
| N3—H1N3···O2 <sup>i</sup> | 0.79 (3)   | 2.07 (3)     | 2.818 (3)    | 158 (3)        |
| C9—H9A···O1 <sup>ii</sup> | 0.9900     | 2.3500       | 3.196 (3)    | 143.00         |
| C9—H9B···O2 <sup>i</sup>  | 0.9900     | 2.3100       | 3.171 (3)    | 144.00         |
| C23—H23A···O1             | 0.9500     | 2.4600       | 3.178 (3)    | 132.00         |

Symmetry codes: (i) x+1, y, z; (ii) -x+1/2, y+1/2, -z+3/2.
